# Supplementary material for: Fast fabrication of homogeneous Ag nanostructures on dual-acid doped polyaniline for SERS applications
Source: Royal Society of Chemistry journal article supplement (doi:10.1039/c4ra02004a), 2014-01-01
Supplement: c4ra02004a1.pdf [file c4ra02004a1.pdf]

## Electronic Supplemental Information

### Fast fabrication of homogeneous Ag nanostructures on dual-acid doped polyaniline for SERS applications

Siwei Li,<sup>a</sup> Lu Xiong,<sup>a</sup> Shuai Liu<sup>a</sup> and Ping Xu<sup>\*ab</sup>

<sup>a</sup> Department of Chemistry, Harbin Institute of Technology, Harbin 150001, China. Email: pxu@hit.edu.cn.

<sup>b</sup> HIT-HAS Laboratory of High-Energy Chemistry and Interdisciplinary Science, Harbin Institute of Technology, Harbin 150001, China.

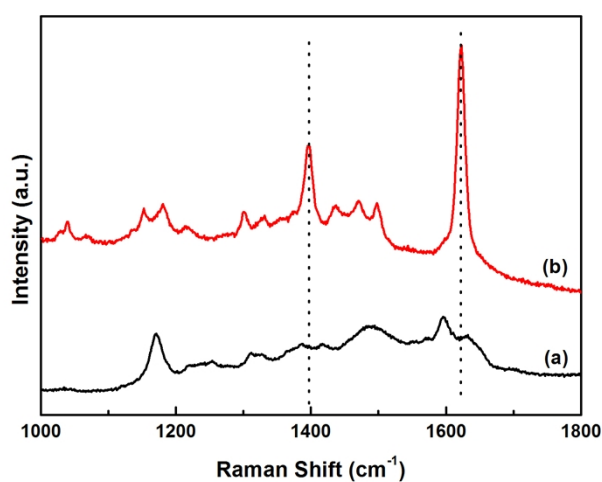

Fig. S1 SERS spectra of pure Ag/PANI (a) and methylene blue on Ag/PANI.

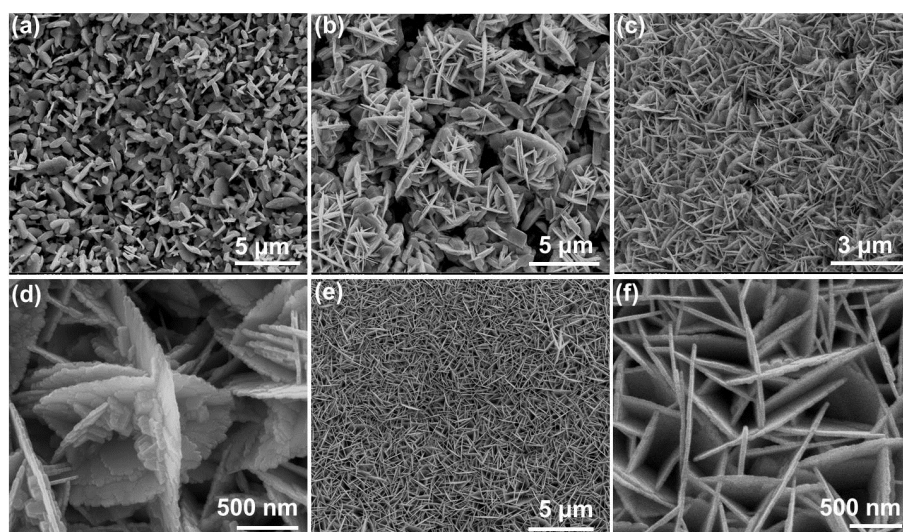

Fig. S2 SEM images of the Ag nanostructures grown on dual-acid (AA and lactic acid) doped PANI membranes for different reaction: (a)30s ; (b)1min; (c,d) 2min; (e,f) 5min.

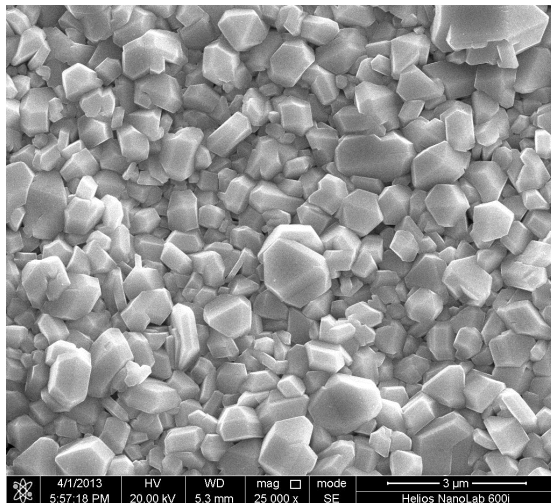

**Fig. S3** SEM images of the Ag nanostructures grown on dual-acid (AA and mandelic acid) doped PANI membranes for 2min.

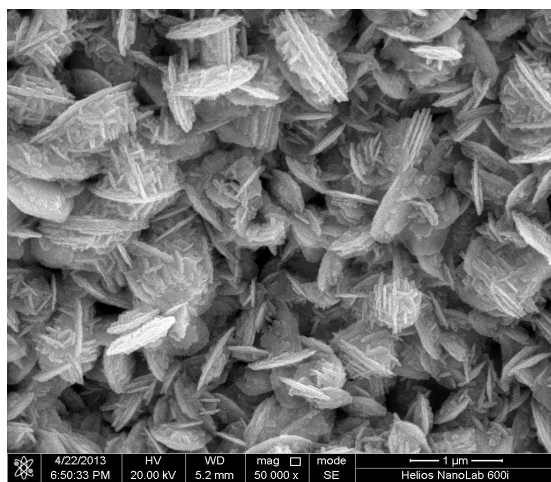

**Fig. S4** SEM images of the Ag nanostructures grown on dual-acid (AA and citric acid) doped PANI membranes for 2min.

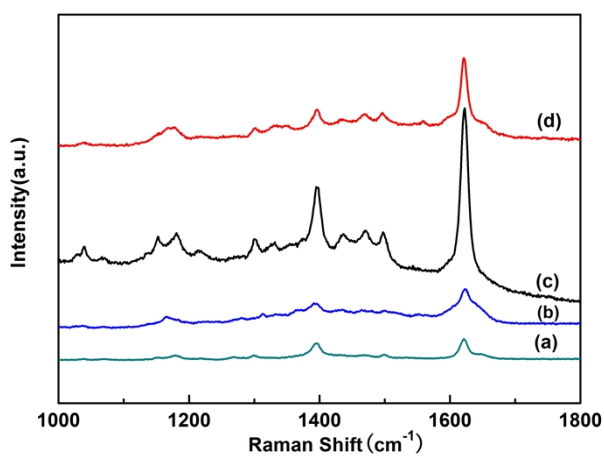

**Fig. S5** SERS spectra of MB with a concentration of  $10^{-6}$  M on the Ag nanostructures grown on dual-acid (AA and succinic acid) doped PANI membranes for different reaction periods: (a) 30 s; (b) 1 min; (c) 2 min; (d) 5 min.

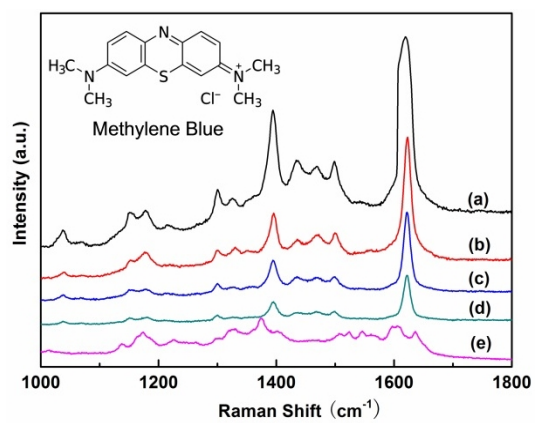

**Fig. S6** SERS spectra of MB on silver nanostructures supported on AA-SA doped PANI membranes at a reaction time of 2 min. (a)  $10^{-4}$  M, (b)  $10^{-6}$  M, (c)  $10^{-8}$  M, (d)  $10^{-10}$  M and (e)  $10^{-11}$  M.
